# Supplementary material for: Adult Frass Provides a Pheromone Signature for Drosophila Feeding and Aggregation
Source: PubMed Central journal article supplement (PMC5045843; doi:10.1007/s10886-016-0737-4), 2016-08-18

Supplemental Figure 6.

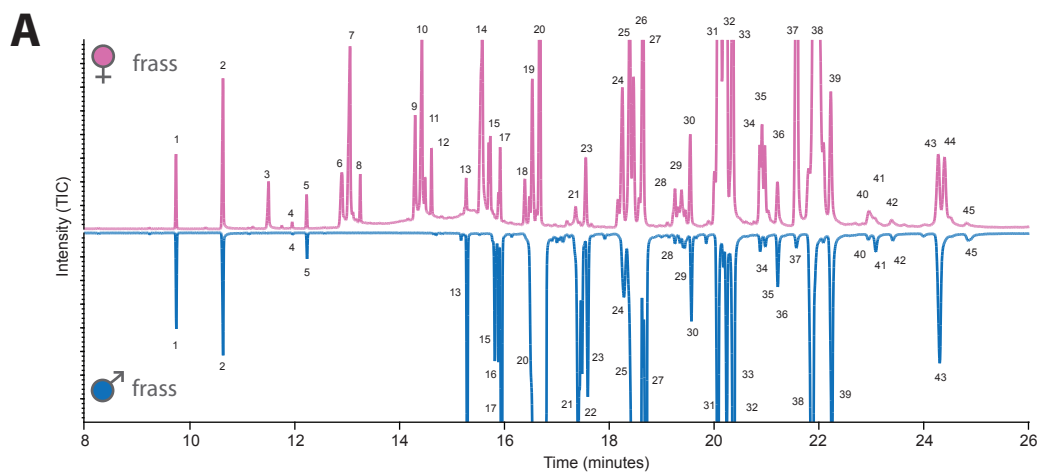

**B**

| Peak No. | Kovats Index | Compound Name                          | Male | Female |
|----------|--------------|----------------------------------------|------|--------|
| 1        | 1329         | Bromodecane (internal standard)        | +    | +      |
| 2        | 1365         | Methylparaben                          | +    | +      |
| 3        | 1498         | Lauric Acid                            | -    | +      |
| 4        | 1527         | Ethyl Laurate                          | +    | +      |
| 5        | 1545         | N-Pentyl-decanamide                    | +    | +      |
| 6        | 1723         | Myristoleic Acid                       | -    | +      |
| 7        | 1724         | Myristic Acid                          | -    | +      |
| 8        | 1726         | Ethyl Myristate                        | -    | +      |
| 9        | 1925         | Methyl Palmitoleate (Palmitoleic Acid) | -    | +      |
| 10       | 1926         | Palmitic Acid                          | -    | +      |
| 11       | 1928         | E-9-Hexadecenoate                      | -    | +      |
| 12       | 1931         | Ethyl Palmitate                        | -    | +      |
| 13       | 2165         | Heneicosane                            | +    | +      |
| 14       | 2188         | Linoleic Acid                          | -    | +      |
| 15       | 2190         | Ethyl Oleate                           | +    | +      |
| 16       | 2194         | (Z)-11-Vaccenyl Acetate (cVA)          | +    | -      |
| 17       | 2195         | Heneicosane                            | +    | +      |
| 18       | 2272         | 7(Z),11(Z)-Heptacosadiene              | -    | +      |
| 19       | 2274         | (Z)-9-Tricosene                        | -    | +      |
| 20       | 2275         | Heneicosane                            | +    | +      |
| 21       | 2279         | Cyclotetracosane                       | +    | +      |
| 22       | 2281         | (Z)-7-Tricosene                        | +    | -      |
| 23       | 2284         | Tetracosane                            | +    | +      |
| 24       | 2481         | (Z)-14-Tricosenyl Formate              | +    | +      |
| 25       | 2487         | (Z)-12-Pentacosene                     | +    | +      |
| 26       | 2493         | (Z)-12-Pentacosene                     | -    | +      |
| 27       | 2498         | Octacosane                             | +    | +      |
| 28       | 2541         | 11-Hexacosyne                          | +    | +      |
| 29       | 2543         | 9-Hexacosene                           | +    | +      |
| 30       | 2547         | Hexacosane                             | +    | +      |
| 31       | 2665         | 7(Z),11(Z)-Heptacosadiene              | +    | +      |
| 32       | 2669         | 1-Heptacosanol                         | +    | +      |
| 33       | 2772         | Heptacosane                            | +    | +      |
| 34       | 2791         | Unknown                                | +    | +      |
| 35       | 2799         | Unknown                                | +    | +      |
| 36       | 2804         | Tetratetracontane                      | +    | +      |
| 37       | 2821         | Squalene                               | +    | +      |
| 38       | 2832         | 7(Z),11(Z)-Nonacosadiene               | +    | +      |
| 39       | 2837         | Hexatriacontane                        | +    | +      |
| 40       | 2901         | 1,30-Triacontanediol                   | +    | +      |
| 41       | 2902         | Unknown                                | +    | +      |
| 42       | 2912         | Unknown                                | +    | +      |
| 43       | 2934         | Hentriacontane                         | +    | +      |
| 44       | 2936         | Tetracontane-1,40-diol                 | +    | +      |
| 45       | 2951         | Tetratriacontane                       | +    | +      |

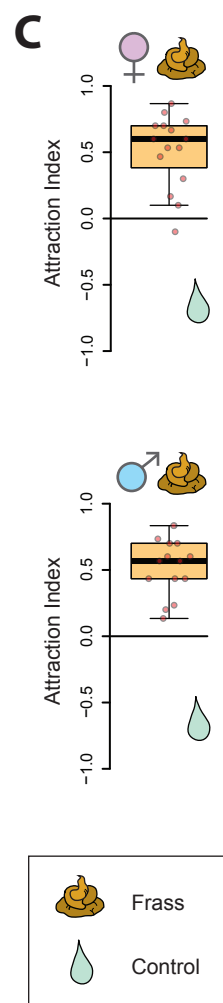

Supplement: 10886_2016_737_MOESM6_ESM.pdf [file 10886_2016_737_MOESM6_ESM.pdf]
