# Supplementary material for: Adult Frass Provides a Pheromone Signature for Drosophila Feeding and Aggregation
Source: PubMed Central journal article supplement (PMC5045843; doi:10.1007/s10886-016-0737-4), 2016-08-18

Supplemental Figure 2.

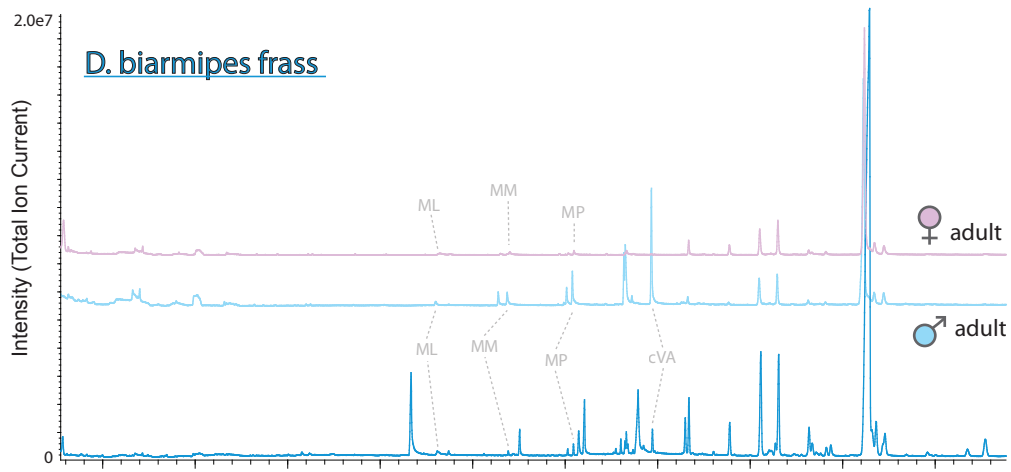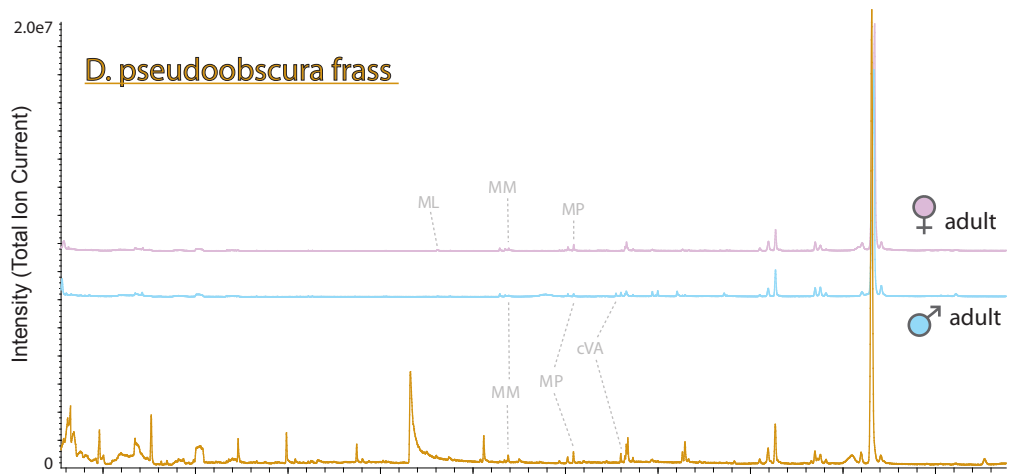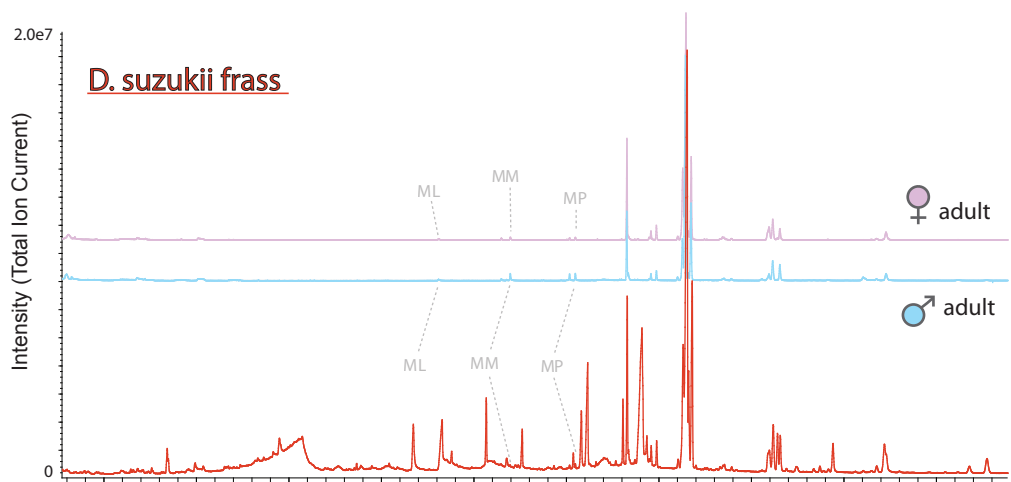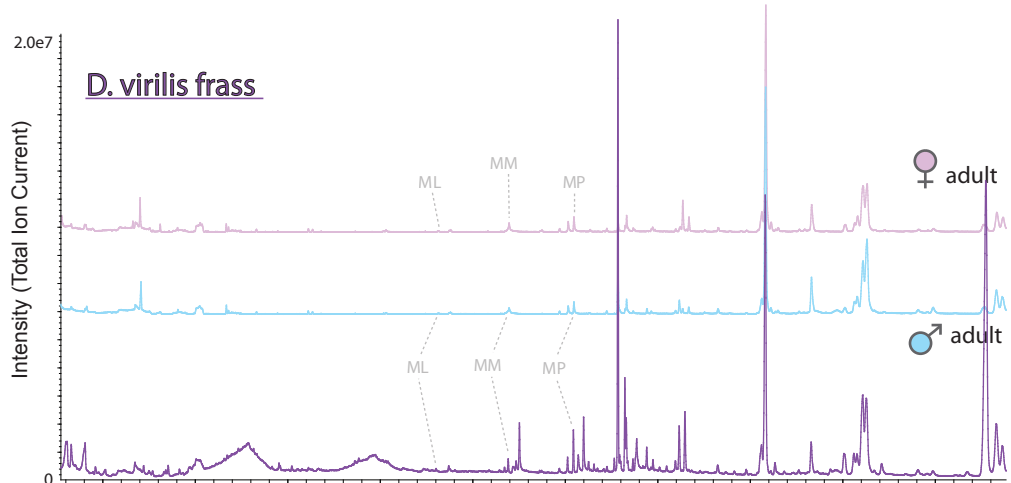

Supplement: 10886_2016_737_MOESM2_ESM.pdf [file 10886_2016_737_MOESM2_ESM.pdf]
